# Supplementary material for: Geniposide inhibits proliferation and induces apoptosis of diffuse large B-cell lymphoma cells by inactivating the HCP5/miR-27b-3p/MET axis
Source: PubMed Central journal article supplement (PMC7645330; doi:10.7150/ijms.51329), 2020-09-23
Supplement: ijmsv17p2735s1.pdf [file ijmsv17p2735s1.pdf]

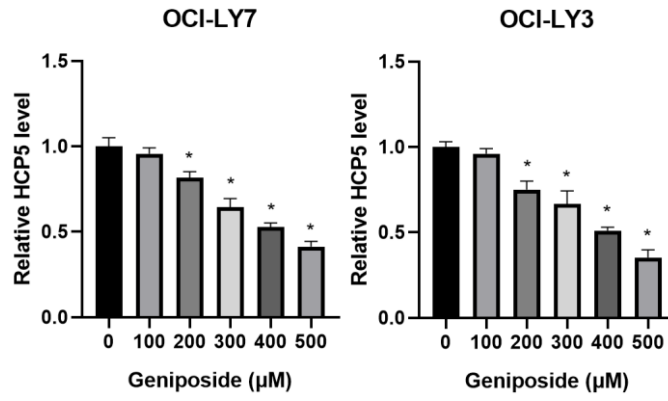

**Supplementary Figure 1 Geniposide reduces HCP5 level in DLBCL cells in a dose-dependent manner.** The level of HCP5 was detected by qRT-PCR analysis in OCI-LY7 and OCI-LY3 cells after geniposide treatment for 24 h at different concentrations. \*P<0.05

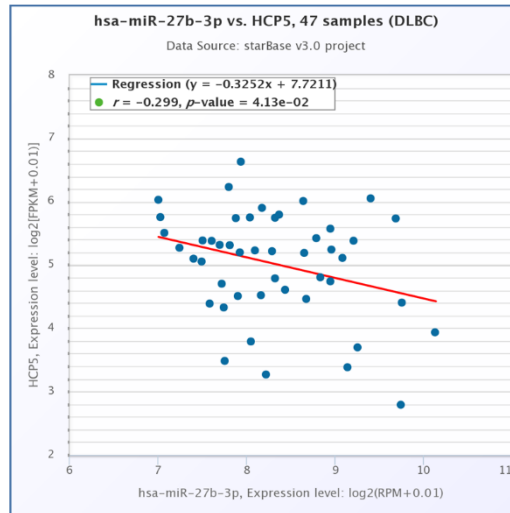

**Supplementary Figure 2 The correlation between HCP5 and miR-27b-3p expression in DLBCL tissues.** Analysis of the TCGA data using starBase webtool confirmed the negative correlation between HCP5 and miR-27b-3p expression in DLBCL tissues.

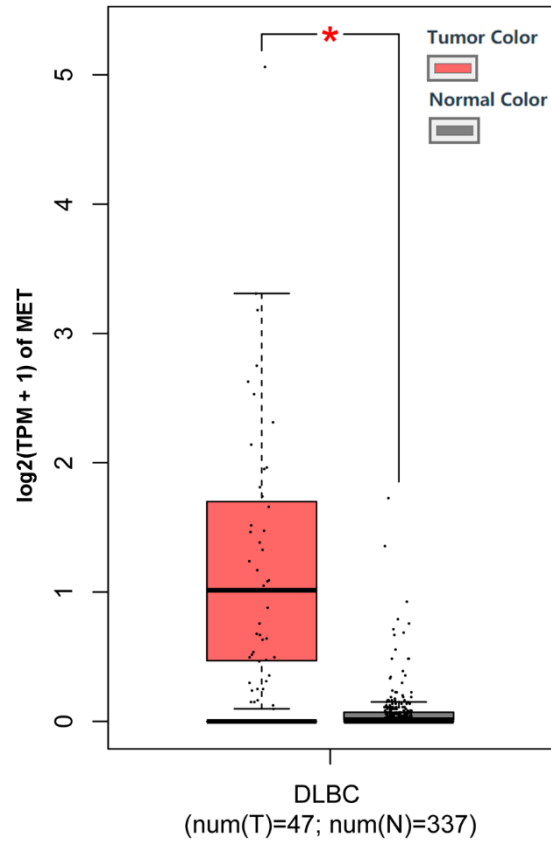

**Supplementary Figure 3 The expression of MET mRNA in DLBCL and normal tissues.** Analysis of the TCGA and GTEx data using GEPIA webtool demonstrated the upregulated expression of MET mRNA in DLBCL tissues compared to normal tissues. \*P<0.05.
